# Supplementary material
Source: MDPI journal article supplement (https://www.mdpi.com/2072-4292/8/2/151)
Supplement: s1 [file s1]

# Supplementary Materials: Mapping Urban Land Use by Using Landsat Images and Open Social Data.

## Remote Sensing 2016, 8, 151.

Tengyun Hu, Jun Yang, Xuecao Li and Peng Gong

**Table S1.** Types of original and aggregated POIs.

| Aggregated Type                  | Initial Type                  | Description                                                                                                                                                                                                         |
|----------------------------------|-------------------------------|---------------------------------------------------------------------------------------------------------------------------------------------------------------------------------------------------------------------|
| Residential                      | Residential area              | communities, villas                                                                                                                                                                                                 |
| Marketing & Recreation           | Automobile sales and service  | Automobile brand stores, car marketing and car maintenance places etc.                                                                                                                                              |
|                                  | Life service                  | removers, travel agencies, laundries, express logistics, business halls of mobile or electric power, beauty salons, <i>etc.</i>                                                                                     |
|                                  | Marketing service             | shopping malls, convenience and department stores, home building material marketplaces, electronic appliance stores, special stores ( <i>i.e.</i> , pawnshop, auction), supermarkets, business streets, <i>etc.</i> |
|                                  | Leisure service               | recreational places( <i>i.e.</i> , nightclub, KTV, bar), holiday resorts, sport stadiums etc.                                                                                                                       |
| Service building                 | Business building             | flats, business office buildings, business premises, <i>etc.</i>                                                                                                                                                    |
|                                  | Banking and insurance service | banks, insurance and security companies etc.                                                                                                                                                                        |
|                                  | Business enterprise           | internet technology, commercial trade, media and advertising affairs, <i>etc.</i>                                                                                                                                   |
| Hotel & Restaurant               | Hotel                         | guesthouses, star-rated hotels, motels etc.                                                                                                                                                                         |
|                                  | Restaurant                    | Chinese and foreign restaurants, cafeterias, coffee shops, dessert shops, snack bars, teahouses, <i>etc.</i>                                                                                                        |
| Industrial                       | Industrial factory            | metallurgy, chemicals, machinery, <i>etc.</i>                                                                                                                                                                       |
| Medical                          | Medical treatment             | special and general hospitals, clinics, animal medical facilities, <i>etc.</i>                                                                                                                                      |
| Educational                      | Educational place             | primary and secondary schools, universities, colleges, research institutions                                                                                                                                        |
| Institutional infrastructure     | Cultural service              | convention centers, museums of art and science etc.                                                                                                                                                                 |
|                                  | Places of interest            | park plazas, monuments                                                                                                                                                                                              |
| Government & Social organization | Government workplace          | government units, public security institutions, traffic management agencies, military workplaces, <i>etc.</i>                                                                                                       |
|                                  | Foreign affair agency         | foreign embassies and offices                                                                                                                                                                                       |
|                                  | Social organization           | social organizations, democratic parties and institutions                                                                                                                                                           |
| Transportation                   | Transportation facilities     | parking, railway stations, bus stations, airports, <i>etc.</i>                                                                                                                                                      |
|                                  | Road ancillary facilities     | toll and service stations                                                                                                                                                                                           |
